# Supplementary material for: Sustainable recovery of molybdenum, cobalt, and bismuth from hazardous spent selective oxidation catalysts via an efficient hydrometallurgical process
Source: Royal Society of Chemistry journal article supplement (doi:10.1039/d5nj03094c), 2025-01-01
Supplement: d5nj03094c1.pdf [file d5nj03094c1.pdf]

## Supporting information

### **Sustainable recovery of molybdenum, cobalt, and bismuth from hazardous spent selective oxidation catalysts via efficient hydrometallurgical process**

Bingzhi Yi<sup>a, b</sup>, Xiangjun Hu<sup>b</sup>, Xuan Chen<sup>c</sup>, Shilong Lin<sup>c</sup>, Sanchuan Yu<sup>a, c, \*</sup>, Doufeng Wu<sup>c, \*</sup>

*<sup>a</sup> School of Materials Science and Engineering, Zhejiang Sci-Tech University, Hangzhou 310018, People's Republic of China*

*<sup>b</sup> Zhejiang Teli Recycling Resources Co., Ltd, Jiaxing 314300, People's Republic of China*

*<sup>c</sup> School of Chemistry and Chemical Engineering, Zhejiang Sci-Tech University, Hangzhou 310018, People's Republic of China*

**\* Corresponding author: School of Chemistry and Chemical Engineering, Zhejiang Sci-Tech University, Hangzhou 310018, People's Republic of China.**

**Tel.: +86-571-86843217; Fax: +86-571-86843217.**

**E-mail: yuschn@163.com (S. Yu), dfwu@zstu.edu.cn (D. Wu).**

## 2. Materials and methods

### 2.1. Materials

The spent selective oxidation catalyst utilized in this study was sourced from a plant located in Jiangsu province, China. A sieving process was used to separate the spent catalyst, which contains some porcelain rings. The macro-porous weakly basic anion exchange resin D314 was purchased from Hangzhou Zhengguang Chemical Company, China. Prior to usage, the resin underwent treatment with sodium hydroxide (NaOH) and hydrochloric acid (HCl) separately to ensure optimal performance. All chemical reagents utilized in this study, including sulfuric acid (H<sub>2</sub>SO<sub>4</sub>), HCl, NaOH, oxalic acid (C<sub>2</sub>H<sub>2</sub>O<sub>4</sub>), potassium chloride (KCl), and magnesium chloride (MgCl<sub>2</sub>), were of analytical grade. De-ionized water served as both dilution and washing water throughout the experimental procedures.

### 2.2. Recovery of metals from spent catalyst

#### 2.2.1 Alkaline leaching of Mo

Alkali-leaching experiments were performed in four-neck round-bottom flask, adhering to the following parameters: alkali-catalyst ratio of 0.35:1, temperature set at 80.0 °C, liquid-to-solid ratio of 4:1, and duration of 120 min [1]. Post-leaching, solid and liquid phases were separated through vacuum filtration. Residue was washed with de-ionized water until reaching neutral pH and then dried at 105 °C for 12 h to prepare for recovery of Co, Bi, Fe, and residual Mo. Leaching solution and wash water were analyzed separately to determine metal ion concentrations for calculating leaching efficiency, with leaching solution specifically used for Mo precipitation.

#### 2.2.2 Purification and precipitation of Mo

The alkaline-leached solution was processed to remove impurities such as alumina, silicon, and

phosphorus by adjusting the pH to 8.0-9.0 with  $\text{MgCl}_2$ , followed by filtration [2]. The clarified solution was then treated with HCl to precipitate  $\text{H}_2\text{MoO}_4$  at pH 1.0 and a temperature of 95.0 °C. After filtration, the precipitate was air-dried at 65.0 °C. Mo enrichment from the mother liquor was achieved using ion exchange with D314 resin [3]. Enrichment trials were conducted in a glass column ( $\phi 20 \times 600$  cm) containing 60.0 mL of wet-packed resin. Following desorption, the Mo - enriched solution was further processed to produce  $\text{H}_2\text{MoO}_4$ .

### *2.2.3 Hot acid leaching*

Hot acid leaching experiments were performed using 2000 mL four-neck round-bottom flask equipped with heating mantles. Each experiment processed 100 g of alkaline leaching residue. Optimal leaching conditions for  $\text{H}_2\text{SO}_4$  were identified through orthogonal tests that varied  $\text{H}_2\text{SO}_4$  concentration (3.0 to 5.0  $\text{mol} \cdot \text{L}^{-1}$ ), temperature (70 to 110 °C), solid-liquid ratio (1:4 to 1:6), and leaching duration (2.0 to 6.0 h). The leached solution was then filtered to separate solution rich in Co, Fe, Mo, and Bi from Bi-rich residue. The residue was extensively washed with de-ionized water and dried at 105.0 °C for 12 h, meeting the quality standards for Bi concentrate used in Bi metallurgy [4]. Metal ion concentrations in the leaching solution and wash water were analyzed to calculate leaching efficiency.

### *2.2.4 Pre-neutralization leaching*

The highly acidic primary hot acid leaching solution was used for pre-neutralization by adding alkaline-leaching residue. After filtration, the residue underwent a second hot acid leaching, while the filtrate was reserved for additional metal recovery processes.

### *2.2.5 Precipitation of Fe*

In the leaching solution containing Co, Fe, Mo, and Bi, the purification phase entailed strategic co-

precipitation of Bi and Mo using the jarosite method. This method required maintaining pH between 1.8 and 2.0 at an elevated temperature of 95.0 °C [5]. Following precipitation and subsequent filtration, the process produced two distinct products: Co-enriched purified solution and solid form of potassium jarosite  $[\text{KFe}_3(\text{SO}_4)_2(\text{OH})_6]$ , within which Mo and Bi were co-precipitated.

#### 2.2.6 Precipitation of Co

Co precipitation was meticulously executed by titrating  $\text{C}_2\text{H}_2\text{O}_4$  solution, with concentration 1.2-fold above the stoichiometric requirement, into the system. Simultaneously, 3.0 M NaOH solution was employed to precisely adjust and maintain pH levels. This reaction proceeded at controlled temperature of 50.0 °C for duration of 2.0 hours, with constant stirring speed set at  $200 \text{ r}\cdot\text{min}^{-1}$  to ensure homogeneity. Following the reaction, the mixture was allowed to cool, followed by filtration. Resultant precipitate was then subjected to series of thorough washings using both de-ionized water and ethanol, serving to eliminate any residual impurities. Finally, clean precipitate was air-dried at temperature of 65.0 °C [6], achieving desired purity and consistency.

#### 2.3. Characterization

Solid phase was first characterized using X-ray diffraction (XRD) and scanning electron microscopy (SEM) before undergoing alkali fusion and dissolution into aqueous phase for quantitative metal analysis. Metal concentrations in aqueous phase were accurately measured using inductively coupled plasma optical emission spectrometry (ICP-OES), following suitable dilution.

### 3. Results and discussion

#### 3.1. Composition, phase and leaching behavior analysis of the spent catalyst

**Table S1.** Chemical composition of the spent catalyst.

| Chemicals | Co | Mo | Fe | Bi | Si | Al | Ca | Mg | P |
|-----------|----|----|----|----|----|----|----|----|---|
|-----------|----|----|----|----|----|----|----|----|---|

|               |       |       |      |      |      |      |      |      |       |
|---------------|-------|-------|------|------|------|------|------|------|-------|
| Content (wt%) | 15.30 | 39.58 | 6.70 | 4.64 | 1.88 | 0.23 | 0.14 | 0.83 | 0.005 |
|---------------|-------|-------|------|------|------|------|------|------|-------|

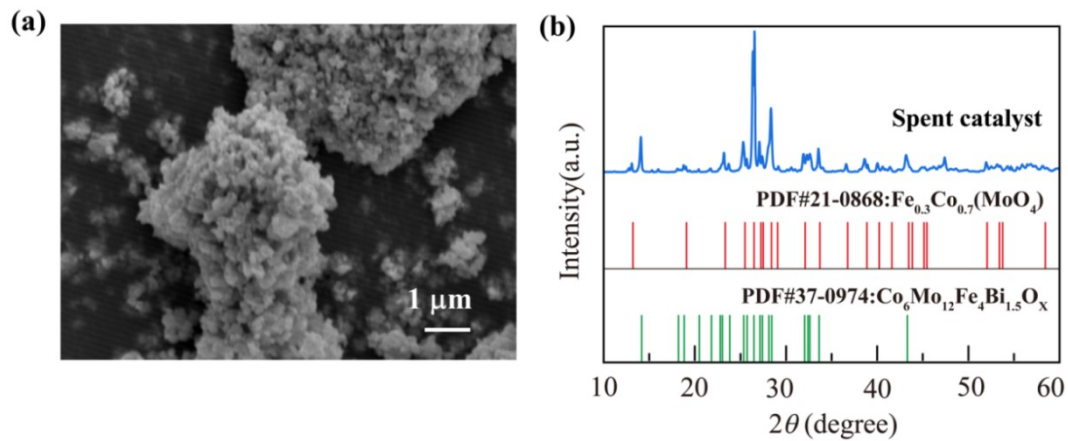

**Fig.S1.** (a) SEM image and (b) XRD spectrum of the spent catalyst.

### 3.2. Recovery of Mo

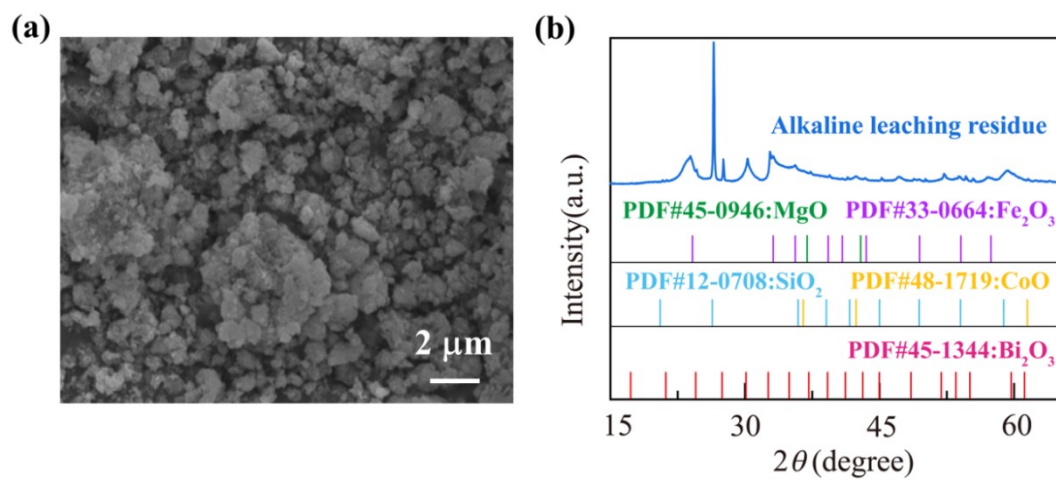

**Fig.S2.** (a) SEM image and (b) XRD spectrum of the alkaline leaching residue.

**Table S2** Chemical compositions of the alkaline leaching residue.

| Element                                       | Co    | Mo   | Fe    | Bi   | Si   | Al   | Ca   | Mg   |
|-----------------------------------------------|-------|------|-------|------|------|------|------|------|
| Alkaline leaching residue after washing (wt%) | 29.03 | 3.76 | 12.87 | 8.60 | 3.47 | 0.42 | 0.26 | 1.54 |

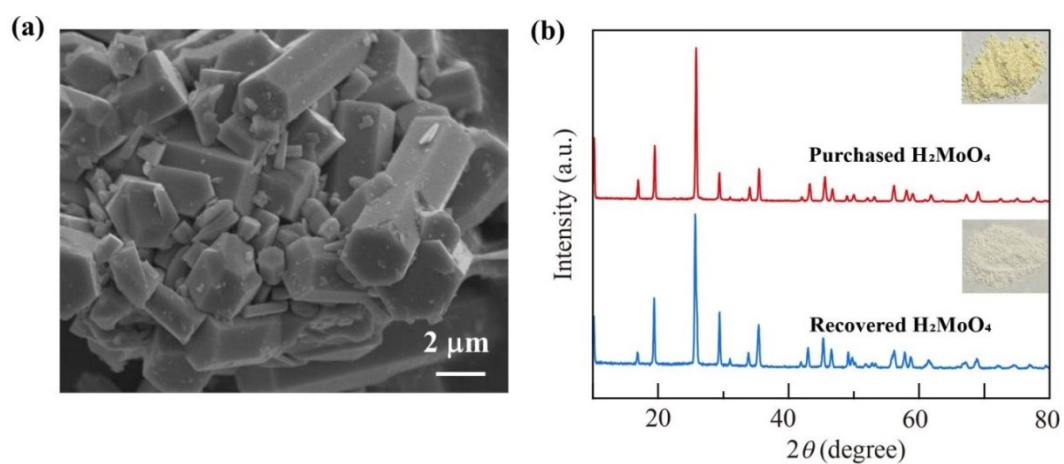

**Fig.S3.** (a) SEM image of the recovered  $\text{H}_2\text{MoO}_4$  and (b) XRD spectra of the purchased and recovered  $\text{H}_2\text{MoO}_4$ .

### 3.3. Hot acid leaching

**Table S3.** Levels and factors affecting the leaching yield.

| Level | Factors                               |                    |                        |      |
|-------|---------------------------------------|--------------------|------------------------|------|
|       | A                                     | B                  | C                      | D    |
|       | $\text{H}_2\text{SO}_4$ concentration | Solid-liquid ratio | Temperature            | Time |
|       | ( $\text{mol}\cdot\text{L}^{-1}$ )    |                    | ( $^{\circ}\text{C}$ ) | (h)  |
| 1     | 3                                     | 1:4                | 70                     | 2    |
| 2     | 4                                     | 1:5                | 90                     | 4    |
| 3     | 5                                     | 1:6                | 110                    | 6    |

**Table S4.** Chemical compositions of hot-acid leaching residue and leach liquor.

| Element                         | Co   | Mo   | Fe   | Bi    | Si    | Al   |
|---------------------------------|------|------|------|-------|-------|------|
| Hot-acid leaching residue after | 0.32 | 0.34 | 1.68 | 27.28 | 12.64 | 0.14 |

|                                                 |       |      |       |      |       |       |
|-------------------------------------------------|-------|------|-------|------|-------|-------|
| washing (wt%)                                   |       |      |       |      |       |       |
| Hot-acid leaching filtrate with                 |       |      |       |      |       |       |
| concentrated washing water (g·L <sup>-1</sup> ) | 41.70 | 4.98 | 15.06 | 3.39 | 0.079 | 0.062 |

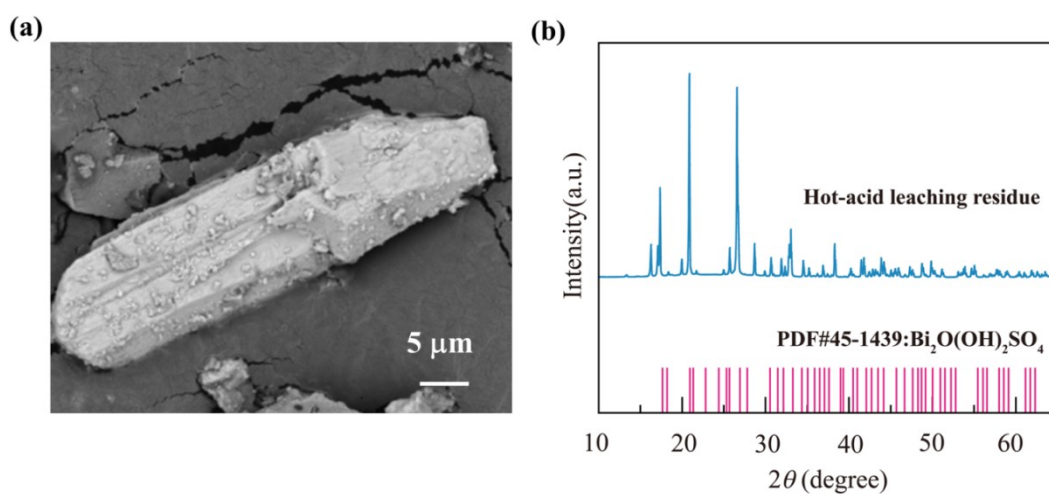

**Fig.S4.** (a) SEM image and (b) XRD spectrum of the hot-acid leaching residue.

**Table S5.** Chemical compositions of pre-neutralization leaching residue and leach liquor.

| Element                                                                                   | Co    | Mo    | Fe    | Bi    | Si   | Al    |
|-------------------------------------------------------------------------------------------|-------|-------|-------|-------|------|-------|
| Pre-neutralization leaching residue after washing (wt%)                                   | 2.99  | 12.09 | 2.05  | 23.44 | 8.48 | 0.46  |
| Pre-neutralization leaching filtrate with concentrated washing water (g·L <sup>-1</sup> ) | 67.43 | 3.05  | 24.08 | 2.79  | 0.11 | 0.079 |

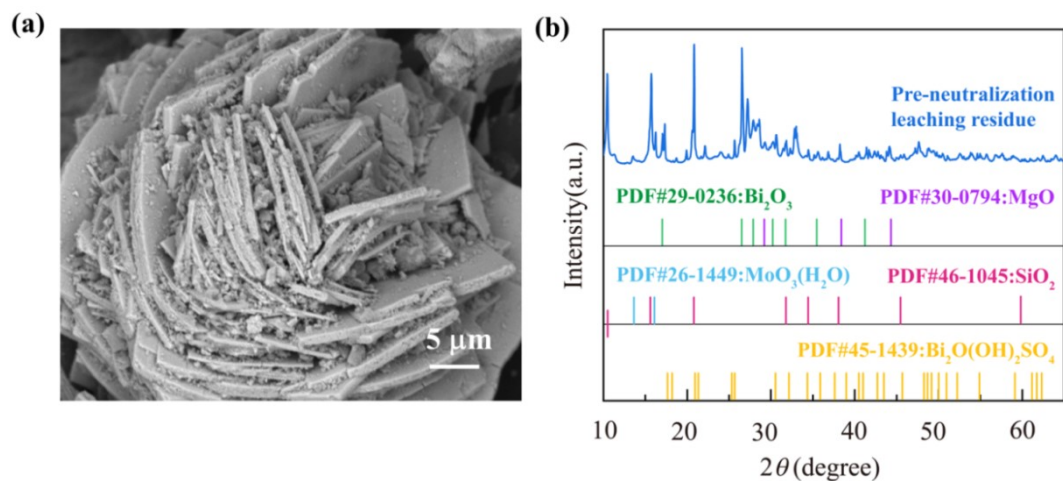

**Fig. S5.** (a) SEM image and (b) XRD spectrum of the pre-neutralization leaching residue.

### 3.4. Recovery of Bi

#### 3.4.1. Co-precipitation of Fe

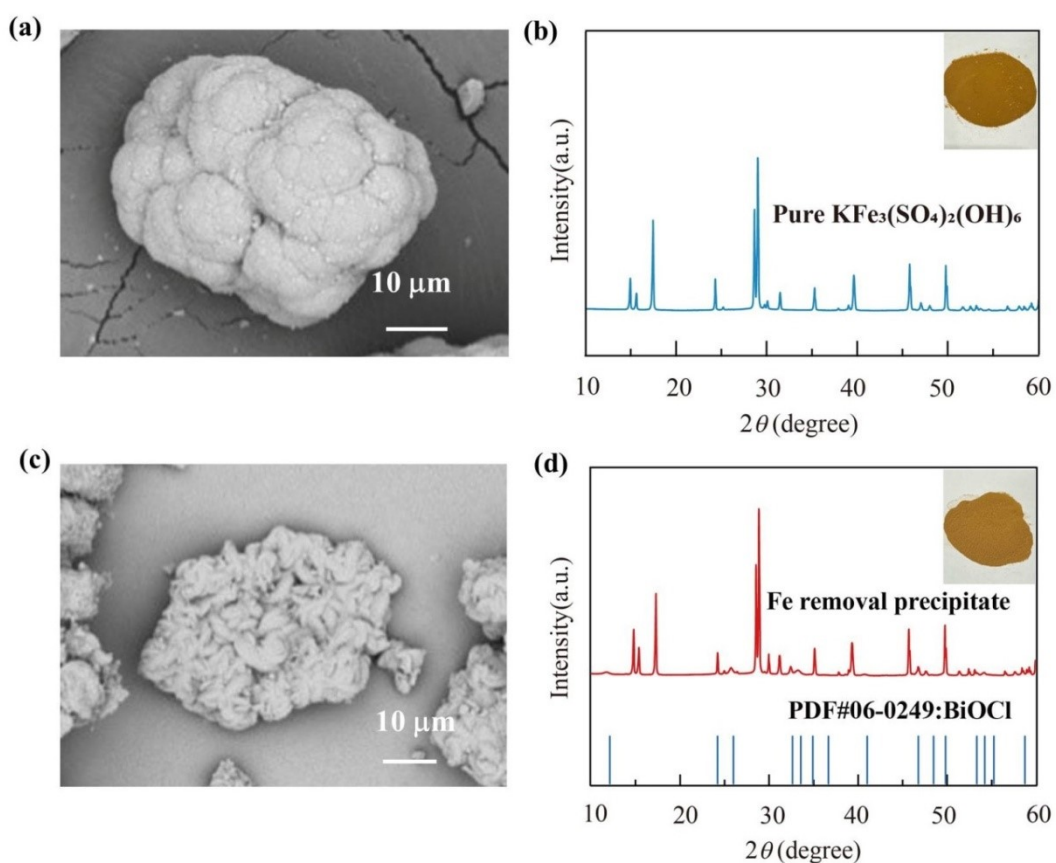

**Fig. S6.** (a, c) SEM images and (b, d) XRD spectra of the pure  $\text{KFe}_3(\text{SO}_4)_2(\text{OH})_6$  and Fe removal precipitate.

**Table S6.** Chemical composition of the Fe removal precipitate.

| Element                      | Co   | Mo   | Fe    | Bi   | K    | S     |
|------------------------------|------|------|-------|------|------|-------|
| Fe removal precipitate (wt%) | 1.57 | 7.01 | 20.81 | 1.79 | 7.21 | 10.61 |

### 3.4.2 Preparation of $\text{CoC}_2\text{O}_4$

**Table S7.** Chemical composition of the purified Co solution.

| Element | Co ( $\text{g}\cdot\text{L}^{-1}$ ) | Mo ( $\text{mg}\cdot\text{L}^{-1}$ ) | Fe( $\text{mg}\cdot\text{L}^{-1}$ ) | Bi( $\text{mg}\cdot\text{L}^{-1}$ ) |
|---------|-------------------------------------|--------------------------------------|-------------------------------------|-------------------------------------|
| Content | 84.09                               | 90.04                                | 3.61                                | <1.0                                |

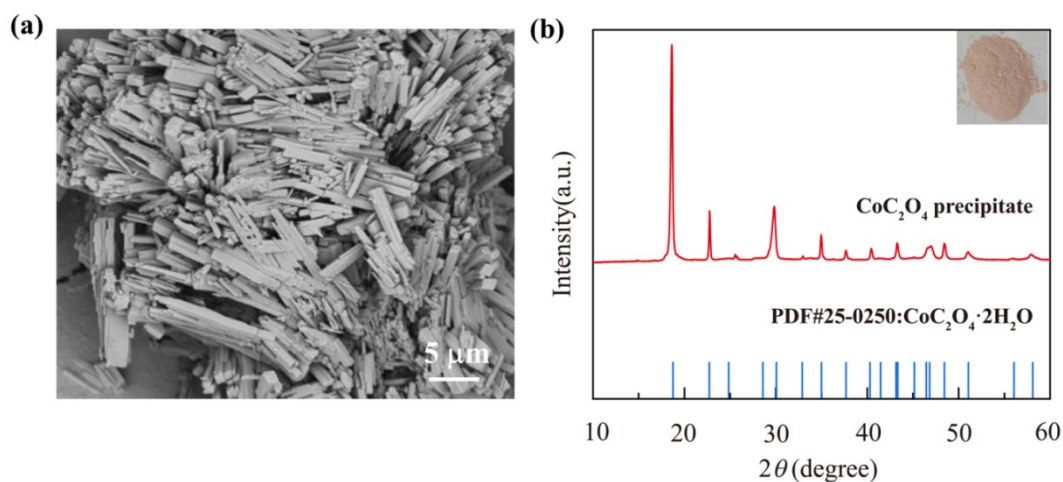**Fig.S7.** (a) SEM image and (b) XRD spectrum of  $\text{CoC}_2\text{O}_4$  precipitate.

## 4. Economic analysis

Under a representative conventional hydrometallurgical scheme, treating 1 t of spent catalyst requires roughly  $\text{MgCl}_2$  (3 kg), HCl (0.95 t), 98%  $\text{H}_2\text{SO}_4$  (0.73 t), KCl (0.06 t), and oxalic acid (0.27 t), for a reagent cost of about USD 427 at current prices. Caustic is the major additional expense: 2.39 t of 30% NaOH, costing about USD 345. The conventional total is therefore about USD 772 per tonne of feed.

The pre-neutralization strategy used here materially lowers caustic demand. Average use of 30%

NaOH falls by 0.87 t per tonne, so only 1.52 t is required (about USD 220), with other reagents on the same price basis. The resulting process cost is about USD 647 per tonne, a 16.2% reduction relative to the conventional approach.

## References

- [1] J.Z. Wang, S.N. Wang, A. Olayiwola, N. Yang, B. Liu, J.J. Weigand, M. Wenzel, H. Du, Recovering valuable metals from spent hydrodesulfurization catalyst via blank roasting and alkaline leaching, *Journal of Hazardous Materials* 416 (2021) 125849.
- [2] Y. Wang, Y. Wang, Y. Li, C. Wu, X. Han, N. Zhao, Z. Zhang, L. Dai, L. Wang, Z. He, A review on vanadium extraction techniques from major vanadium-containing resources, *Rare Metals* 43 (2024) 4115–4131.
- [3] F. Guo, X.L. Xi, L.W. Ma, Z.R. Nie, Property and mechanism on sorption of molybdenum from tungstate solution with a porous amine resin, *Journal of Cleaner Production* 335 (2022) 130304.
- [4] C. Wang, G. Wang, W. Zhu, H. Xiang, L. Zheng, J. Zhang, J. Chen, G. Fu, J. Pan, R. Wang, Advancements in the separation, purification, and smelting technology of bismuth: A review, *Sep. Purif. Technol.* 355 (2025) 129684.
- [5] N. Eftekhari, M. Kargar, F.R. Zamin, N. Rastakhiz, Z.A. Manafi, A Review on Various Aspects of Jarosite and Its Utilization Potentials, *Annales De Chimie-Science Des Materiaux* 44 (1) (2020) 43-52.
- [6] B. Chen, H. Du, Y. Guo, S. Wang, J. Peng, Y. Zhang, L. Li, C. Xu, Recovering valuable metals from spent hydrodesulfurization catalysts by co-leaching, dissociation, and stepwise precipitation, *J. Environ. Chem. Eng.* 11 (2023) 109365.
